# Supplementary material for: Interacting effects of land-use change and natural hazards on rice agriculture in the Mekong and Red River deltas in Vietnam
Source: Copernicus journal article supplement (doi:10.5194/nhess-21-1473-2021), 2021-05-12
Supplement: Supplementary file 1 [file nhess-21-1473-2021-supplement.zip]

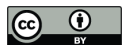

*Supplement of*

## **Interacting effects of land-use change and natural hazards on rice agriculture in the Mekong and Red River deltas in Vietnam**

**Kai Wan Yuen et al.**

*Correspondence to:* Kai Wan Yuen (yuenjq@gmail.com)

- nhess-21-1473-2021-supplement-title-page.pdf
- Supplementary materials 7 may 2021.docx

The copyright of individual parts of the supplement might differ from the article licence.
